# Supplementary material for: Searching for New Z-DNA/Z-RNA Binding Proteins Based on Structural Similarity to Experimentally Validated Zα Domain
Source: MDPI journal article supplement (doi:10.3390/ijms23020768), 2022-01-11

## Supplementary material 2 – AlphaFold structures of predicted Z-DNA/Z-RNA binding proteins from *Homo sapiens*

*Note: Model confidence legends depicted below, position of Z-alpha domain structural similarity is always highlighted in red dashed circle*

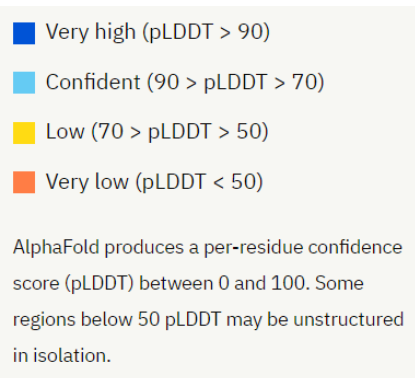

Accessed from: <https://alphafold.ebi.ac.uk/>

*Citation:*

Jumper, J et al. Highly accurate protein structure prediction with AlphaFold. Nature (2021).

### Homologous-pairing protein 2 homolog Q9P2W1 (HOP2\_HUMAN)

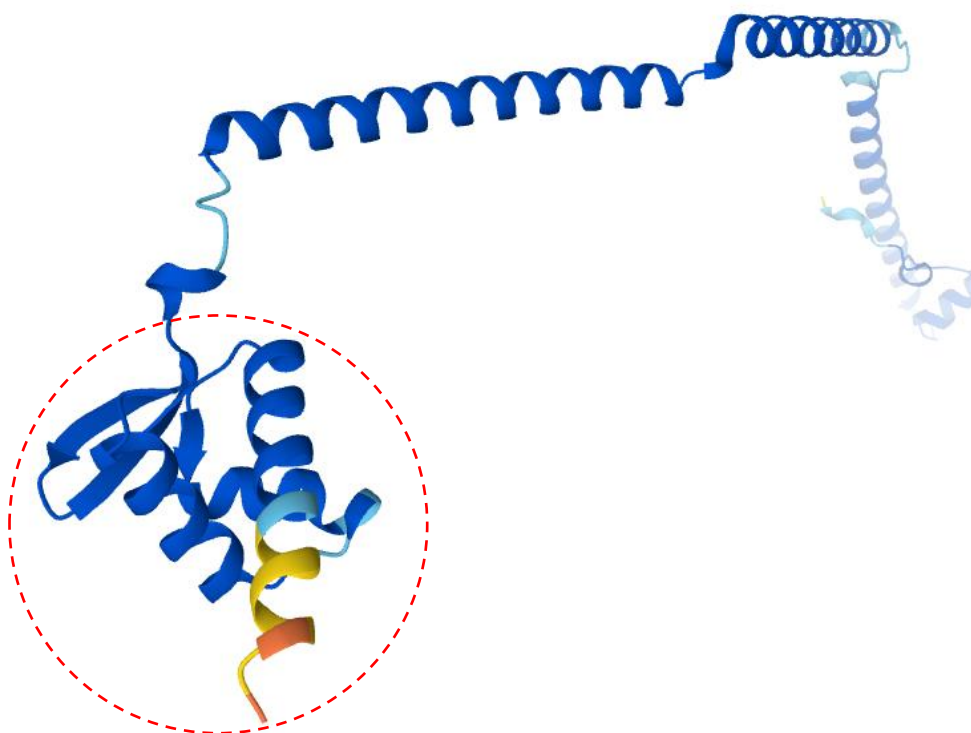

**Replication protein A 32 kDa subunit P15927 (RFA2\_HUMAN)**

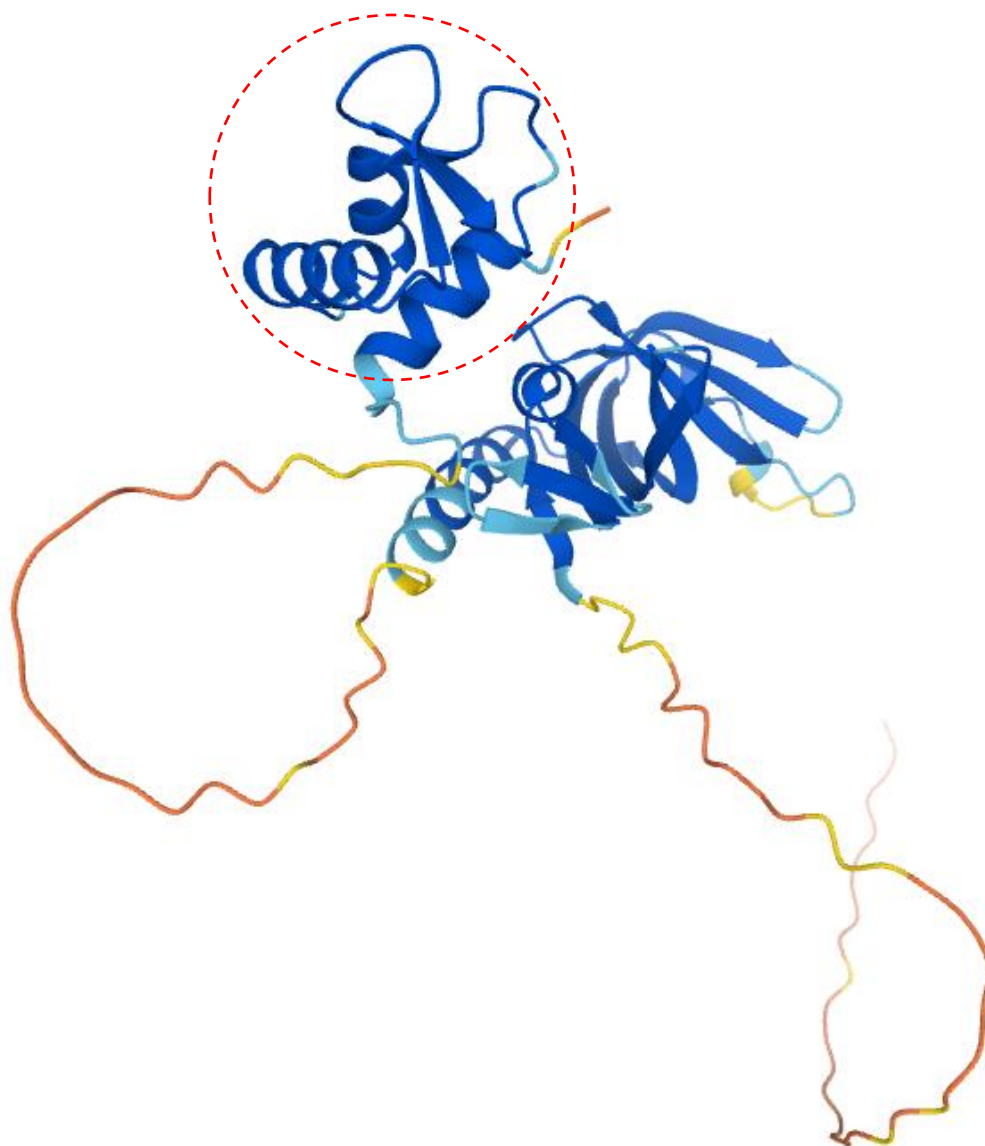

Cullin-1 Q13616 (CUL1\_HUMAN)

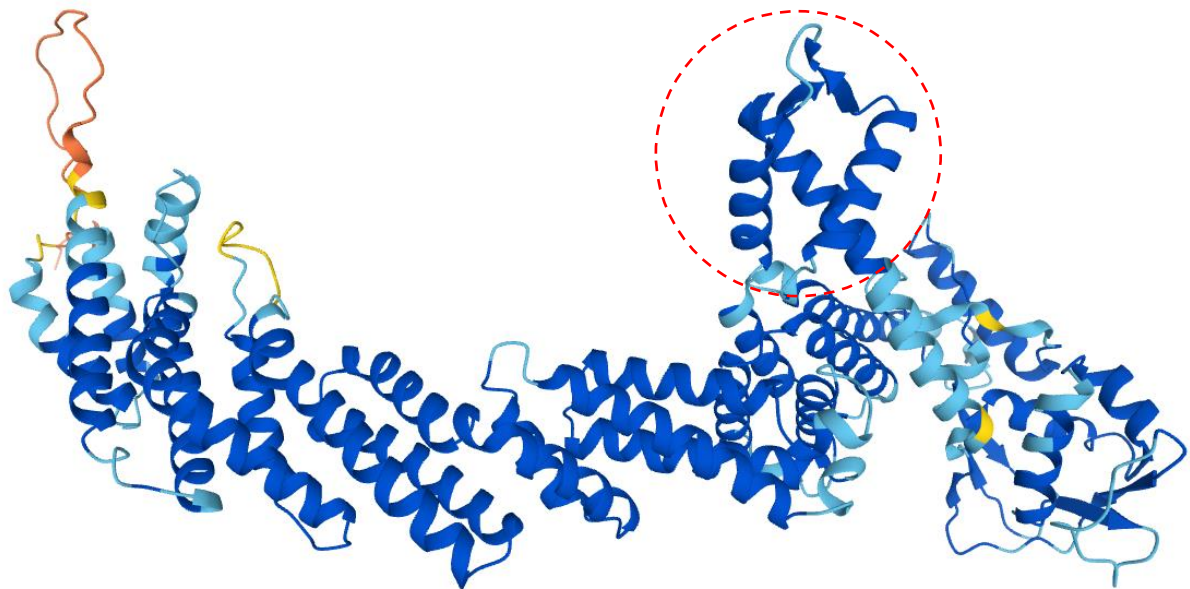

**Anaphase-promoting complex subunit 2 Q9UJX6 (ANC2\_HUMAN)**

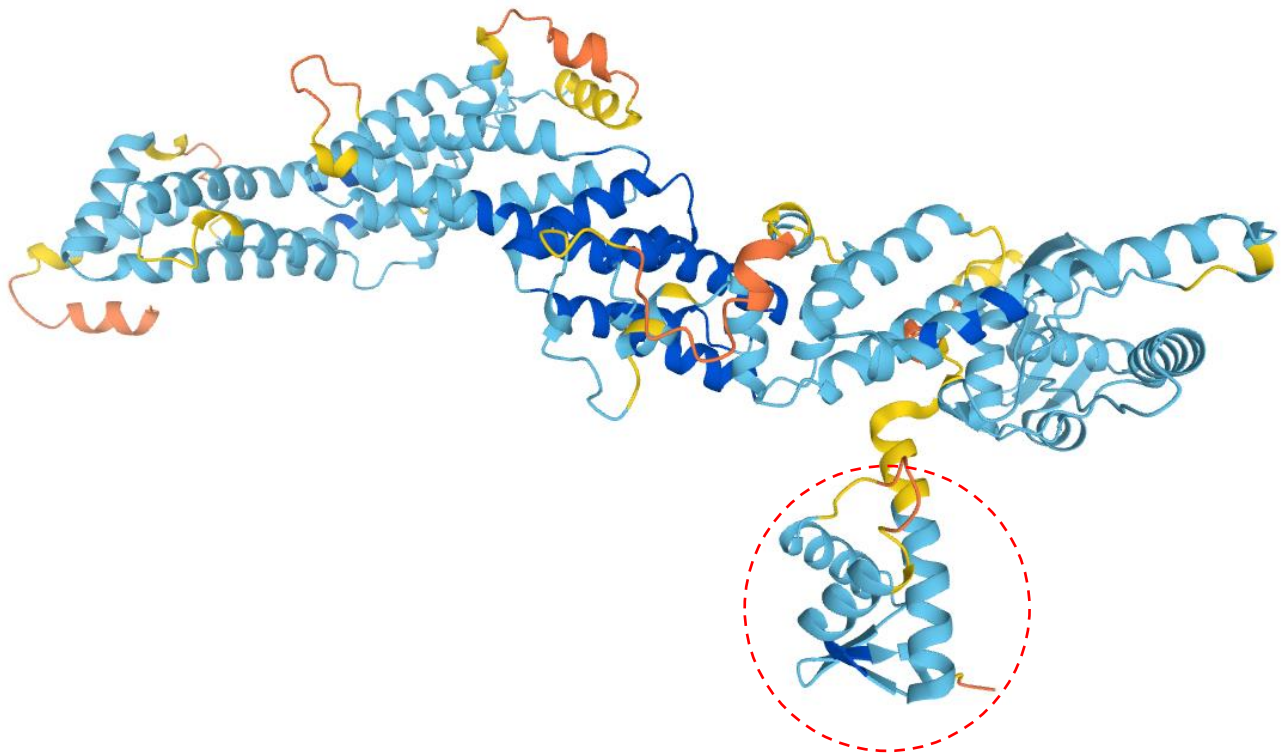

**DNA-directed RNA polymerase III subunit RPC6 Q9H1D9 (RPC6\_HUMAN)**

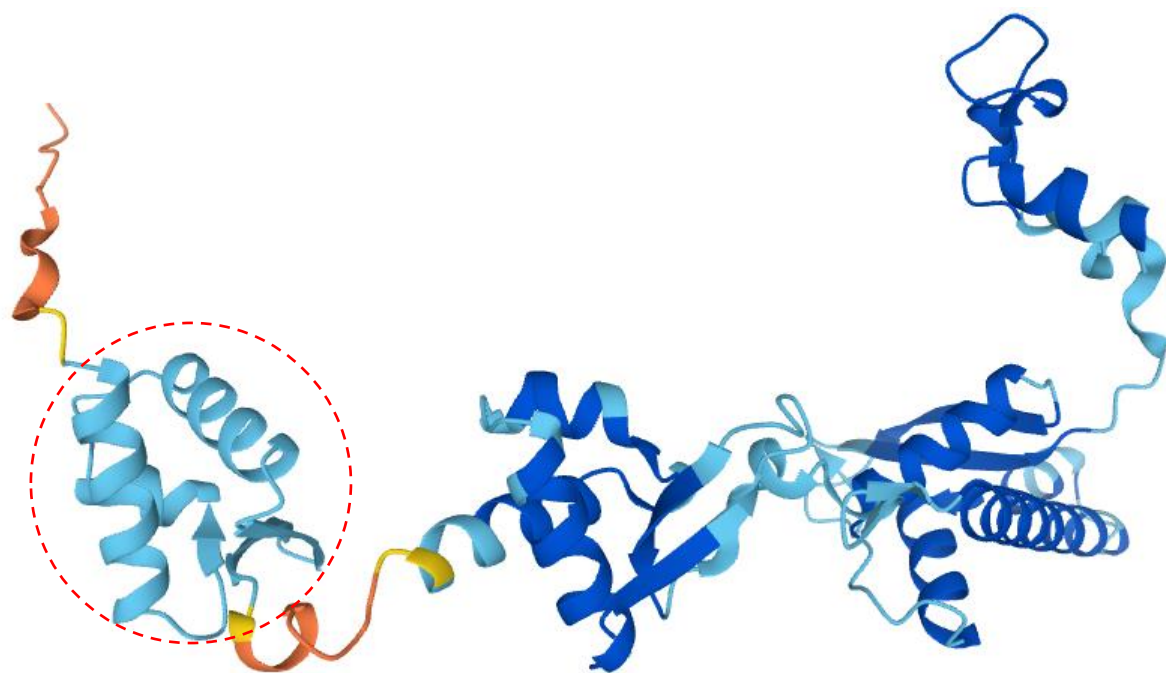

Supplement: s1 [file s1]
