# Supplementary material for: Searching for New Z-DNA/Z-RNA Binding Proteins Based on Structural Similarity to Experimentally Validated Zα Domain
Source: MDPI journal article supplement (doi:10.3390/ijms23020768), 2022-01-11
Supplement: s1 [file s1]

### Supplementary material 3

Prediction of nuclear localization signals in putative Z-DNA/Z-RNA binding proteins, cNLS Mapper webserver was used ([http://nls-mapper.iab.keio.ac.jp/cgi-bin/NLS\\_Mapper\\_form.cgi](http://nls-mapper.iab.keio.ac.jp/cgi-bin/NLS_Mapper_form.cgi)) with cut-off score equal to 3

>sp|O35047|HOP2\_MOUSE Homologous-pairing protein 2 homolog OS=Mus musculus OX=10090  
GN=Psmc3ip PE=1 SV=1

### cNLS Mapper Result

| Predicted NLSs in query sequence                   |     |  |
|----------------------------------------------------|-----|--|
| MSKSRAEAAAGAPGIILRYLQEQNRPYSAQDVFGNLQKEHGLGKAAVVKA | 50  |  |
| LDQLAQEGKIKEKTYGKQKIYFADQNQFDTVSDADLHGLDASIVALTAKV | 100 |  |
| QSLQQSCRHMEAEKELTSALTTPEMQKEIQELKKECAQYTERLKNIAA   | 150 |  |
| TNHVTPEEKEKVYRDRQKYCKEWRKRKRMTTELCDAILEGYPKSKKQFFE | 200 |  |
| EVGIETDEHDHNVLLPDP                                 | 217 |  |

| Predicted monopartite NLS |                |       |
|---------------------------|----------------|-------|
| Pos.                      | Sequence       | Score |
| 172                       | EWKRKRKRMTTELC | 6     |
| 172                       | EWKRKRKRMTT    | 8     |
| 174                       | RKRKRMTTE      | 3     |

| Predicted bipartite NLS |                                      |       |
|-------------------------|--------------------------------------|-------|
| Pos.                    | Sequence                             | Score |
| 39                      | EHGLGKAAVVKALDQLAQEGKIKEKTYGKQKIY    | 3.1   |
| 142                     | ERLKNIAATNHVTPEEKEKVYRDRQKYCKE       | 3.3   |
| 143                     | RLKNIAATNHVTPEEKEKVYRDRQKYCKEW       | 3.4   |
| 164                     | RDRQKYCKEWRKRKRMTTELCDAILEGYPKSKK    | 4.9   |
| 166                     | RQKYCKEWRKRKRMTTELCDAILEGYPKSKKQFFEE | 3.2   |
| 171                     | KEWRKRKRMTTELCDAILEGYPKSKK           | 7.6   |
| 171                     | KEWRKRKRMTTELCDAILEGYPKSKKQF         | 5.2   |
| 171                     | KEWRKRKRMTTELCDAILEGYPKSKKQFFE       | 8.1   |
| 171                     | KEWRKRKRMTTELCDAILEGYPKSKKQFFEE      | 6.9   |
| 171                     | KEWRKRKRMTTELCDAILEGYPKSKKQFFEE      | 4.8   |
| 172                     | EWKRKRKRMTTELCDAILEGYPKSKK           | 6.4   |
| 172                     | EWKRKRKRMTTELCDAILEGYPKSKKQF         | 3.7   |
| 172                     | EWKRKRKRMTTELCDAILEGYPKSKKQFFE       | 8     |
| 172                     | EWKRKRKRMTTELCDAILEGYPKSKKQFFEE      | 6.1   |

>sp|P15927|RFA2\_HUMAN Replication protein A 32 kDa subunit OS=Homo sapiens OX=9606  
GN=RPA2 PE=1 SV=1

## cNLS Mapper Result

| Predicted NLSs in query sequence                           |     |
|------------------------------------------------------------|-----|
| MWNSGFESYGSSSYGGAGGYTQSPGGFGSPAPSQAEEKSRARAQHIVPCT         | 50  |
| ISQLLSATLVDEVFRIGNVEISQVTIVGIIRHAEKAPTNIIVYKIDDMTAA        | 100 |
| PMDVRQWVDTTSSSENTVVPPEYVVKVAGHLRSFQNKSLVAFKIMPLE           | 150 |
| DMNEFTTHILEVINAHMVLKANSQPSAGRAPISNPGMSEAGNFGGNSFM          | 200 |
| PANGLTVAQNQVLNLIKACPRPEGLNFQDLKNQLKHMSVSSI <b>KQAVDFLS</b> | 250 |
| <b>NEGHIYSTVDDHFKSTDAE</b>                                 | 270 |

| Predicted monopartite NLS |          |       |
|---------------------------|----------|-------|
| Pos.                      | Sequence | Score |
|                           |          |       |

| Predicted bipartite NLS |                             |       |
|-------------------------|-----------------------------|-------|
| Pos.                    | Sequence                    | Score |
| 243                     | KQAVDFLSNEGHIYSTVDDHFKSTDAE | 3.5   |

>sp|Q12018|CDC53\_YEAST Cell division control protein 53 OS=Saccharomyces cerevisiae (strain ATCC 204508 / S288c) OX=559292 GN=CDC53 PE=1 SV=1

| Predicted NLSs in query sequence                    |     |
|-----------------------------------------------------|-----|
| MSETLPRSDDEATWNFIEPGINQILGNEKNQASTSKRVYKILSPTMYME   | 50  |
| VYTAIYNYCVNKSRRSSGHFSTDSRTGQSTILVGSEIYEKLKNYLKNYILN | 100 |
| FKQSNSETFLQFYVVKRWKRFTIGAIFLNHAFDYMNRVWQKERSDGKRHI  | 150 |
| FDVNTLCLMTWKEVMFDPKDVLINELLDQVTLGREGQIIQRSNISTAIK   | 200 |
| SLVALGIDPQDLKKLNLVYIQVFEKPFLLKKTQEYVTQYNDYLEKHSVT   | 250 |
| EYIFEAEHIIKREEKAMTIYDDHTKKPLSMALNKVLITDHIEKLENEFV   | 300 |
| VLLDARDIEKITSLYALIRRDFTLIPRMASVFENYVKKTGENEISSLLAM  | 350 |
| HKHNIMKNENANPKKLALMTAHSLSPKDYIKKLEVDHIFSKIFNESFPD   | 400 |
| DIPLAKALDNACGAFININEFALPAGSPKSATSKTSEMLAKYSDILLKKA  | 450 |
| TKPEVASDMSDEDIITIFKYLTDKDAFETHYRRLFAKRLIHGTSTSAEDE  | 500 |
| ENIIQRLQAANSMEYTGKITKMFQDIRLSKILEDDFAVALKNEDYSKAK   | 550 |
| YPDLPQFVLAENMWPFYSQVEFEKLPKELVPSHEKLESYSQKHNGRILK   | 600 |
| WLWPLCRGELKADIGKPGRMFPNFTVTLFQMAILLLYNDADVLTLENIQE  | 650 |
| GTSLTIQHIAAAMVPFIKFKLIQQVPPGLDALVKPETQFKLSRPYKALKT  | 700 |
| NINFASGVKNDILQSLSGGGHDNHGKNLGNKRLTEDERIEKELNTERQIF  | 750 |
| LEACIVRIMKAKRNLPHHTLVNECIAQSHQRFNAKVS               | 800 |
| YLQRGDDGESYAYLA                                     | 815 |

| Predicted monopartite NLS |          |       |
|---------------------------|----------|-------|
| Pos.                      | Sequence | Score |
|                           |          |       |

| Predicted bipartite NLS |                                   |       |
|-------------------------|-----------------------------------|-------|
| Pos.                    | Sequence                          | Score |
| 36                      | SKRVYKILSPTMYMEVYTAIYNYCVNK       | 3.2   |
| 37                      | KRVYKILSPTMYMEVYTAIYNYCVNKSRRSSG  | 3.2   |
| 88                      | EKLKNYLKNYILNFKQSNSETFLQFYVVKRWK  | 3.2   |
| 91                      | KNYLKNYILNFKQSNSETFLQFYVVKRWKRFTI | 4     |
| 115                     | KRWKRFTIGAIFLNHAFDYMNRVWQKERSD    | 3.3   |
| 426                     | GSPKSATSKTSEMLAKYSDILLKKATKPE     | 3.7   |
| 426                     | GSPKSATSKTSEMLAKYSDILLKKATKPEV    | 3     |
| 482                     | RRLFAKRLIHGTSTSAEDEENIIQRLQAAN    | 3     |
| 482                     | RRLFAKRLIHGTSTSAEDEENIIQRLQAANSME | 3.2   |
| 665                     | PFIKFKLIQQVPPGLDALVKPETQFKLSRPY   | 6.4   |
| 666                     | FIKFKLIQQVPPGLDALVKPETQFKLSRPY    | 3.3   |
| 709                     | KNDILQSLSGGGHDNHGKNLGNKRLTED      | 3.8   |
| 757                     | RIMKAKRNLPHHTLVNECIAQSHQRFNAKVS   | 3.6   |
| 757                     | RIMKAKRNLPHHTLVNECIAQSHQRFNAKVS   | 3     |
| 757                     | RIMKAKRNLPHHTLVNECIAQSHQRFNAKVSM  | 5     |
| 757                     | RIMKAKRNLPHHTLVNECIAQSHQRFNAKVMVK | 3     |

>sp|Q13616|CUL1\_HUMAN Cullin-1 OS=Homo sapiens OX=9606 GN=CUL1 PE=1 SV=2

| Predicted NLSs in query sequence                   |     |
|----------------------------------------------------|-----|
| MSSTRSQNPGLKQIGLDQIWDDLRAQIQVYTRQSMASRYMELYTHVY    | 50  |
| NYCTSVHQSNQARGAGVPPSKSKKGQTPGGAQFVGLELYKRLKEFLKNYL | 100 |
| TNLLKDGEDLMDESVLKFYTTQWEDYRFSSKVLNGICAYLNRHWRRECD  | 150 |
| EGRKGIYEIYSLALVTWRDCLFRPLNKQVTNAVLKLIKERNGETINTRL  | 200 |
| ISGVVQSYVELGLNEDDAFAKGPTLTVYKESFESQFLADTERFYTRETE  | 250 |
| FLQQNPVTEYMKAEARLLEEQRVQVYLHESTQDELARKCEQVLIKHL    | 300 |
| EIFHTEFQNLLDADKNEDLGRMYNLVSRIQDGLGELKKLLETHHNQGLA  | 350 |
| AIEKCGEALNDPKMYVQTVLDVHKYNALVMSAFNNDAGFVAALDKACG   | 400 |
| RFINNNAVTKMAQSSSKSPELLARYCDSLLKKSSKNPEEALEDTLNQVM  | 450 |
| VVFYIEDKDVFKFYAKMLAKRLVHQNSASDDAEASMISKLKQACGFEY   | 500 |
| TSKLQRMFQDIGVSKDLNEQFKKHLTNSEPLDLDFSIQVLSGSGWPFQQS | 550 |
| CTFALPSELEERSYQRTAFYASRHSGRKLTWLYQLSKGELVTNCFKNRYT | 600 |
| LQASTFQMAILLYNTEDAYTVQQLTDSTQIKMDILAQVLQILLKSKLLV  | 650 |
| LEDENANVDEVELKPDTLIKLYLGYNKKLRVNINVPMKTEQKQEQTTH   | 700 |
| KNIEEDRKLIIQAAIVRIMKMRKVLKHQQLLGEVLTQLSSRFKPRVPVIK | 750 |
| KCIDILIEKEYLERVDGEKDTYSYLA                         | 776 |

| Predicted monopartite NLS |            |       |
|---------------------------|------------|-------|
| Pos.                      | Sequence   | Score |
| 673                       | LGYNKKLRVN | 3     |

| Predicted bipartite NLS |                                    |       |
|-------------------------|------------------------------------|-------|
| Pos.                    | Sequence                           | Score |
| 63                      | RGAGVPPSKSKKGQTPGGAQFVGLELYKRLKEFL | 4.2   |
| 90                      | KRLKEFLKNYLTNLLKDGEDLMDESVLKFYT    | 3.3   |
| 91                      | RLKEFLKNYLTNLLKDGEDLMDESVLKFYT     | 4.9   |
| 91                      | RLKEFLKNYLTNLLKDGEDLMDESVLKFYTQQWE | 3     |
| 146                     | RRECDGRKGIYEIYSLALVTWRDCLFRPLNKQVT | 3     |
| 408                     | VTKMAQSSSKSPELLARYCDSLLKKSS        | 3.3   |
| 408                     | VTKMAQSSSKSPELLARYCDSLLKKSSKNP     | 6.7   |
| 424                     | RYCDSLLKKSSKNPEEALEDTLNQVMVVFYIEDK | 4.5   |
| 464                     | KFYAKMLAKRLVHQNSASDDAEASMISKLK     | 3.1   |
| 468                     | KMLAKRLVHQNSASDDAEASMISKLKQA       | 3.5   |
| 468                     | KMLAKRLVHQNSASDDAEASMISKLKQACG     | 5.1   |
| 468                     | KMLAKRLVHQNSASDDAEASMISKLKQACGFE   | 3.7   |
| 489                     | ISKLKQACGFEYTSKLQRMFQDIGVSKDLNE    | 3.3   |
| 573                     | RHSGRKLTWLYQLSKGELVTNCFKNRYTLQAST  | 3     |
| 643                     | LLKSKLLVLEDENANVDEVELKPDTLIKLY     | 4.5   |
| 646                     | SKLLVLEDENANVDEVELKPDTLIKLYL       | 3.3   |
| 676                     | KNKKLRVNINVPMKTEQKQEQTTHKNIEED     | 4.1   |
| 697                     | ETTHKNIEEDRKLIIQAAIVRIMKMRKVLKH    | 6.3   |
| 717                     | RIMKMRKVLKHQQLLGEVLTQLSSRFKPRVP    | 4.4   |
| 717                     | RIMKMRKVLKHQQLLGEVLTQLSSRFKPRVPVIK | 3.2   |
| 722                     | RKVLKHQQLLGEVLTQLSSRFKPRVPVIKKCI   | 4.6   |

>sp|Q9UJX6|ANC2\_HUMAN Anaphase-promoting complex subunit 2 OS=Homo sapiens OX=9606  
GN=ANAPC2 PE=1 SV=1

| Predicted NLSs in query sequence                    |     |
|-----------------------------------------------------|-----|
| MAAAVVVAEGSDSRPGQELLVAWNTVSTGLVPPAALGLVSSRTSGAVPP   | 50  |
| KEELRAAVEVLRGHGLHSLVEEFVEVLQNDLQANISPEFWNAISQCEN    | 100 |
| SADEPQCLLLLDAGLLESRLDPYLRSELELEKWTRLGLLMGTGAQGLR    | 150 |
| EEVHTMLRGVLFFSTPRTFQEMIQRLYGCFLRVYMQSKRKGEAGTDPELE  | 200 |
| GELDSRYARRRYRLLQSPLCAGCSSDKQQCWCRQALEQFHQLSQVLHRL   | 250 |
| SLLERVSAAEAVTTTLHQVTRERMEDRCRGEYERSFLREFHKWIERVVGWL | 300 |
| GKVFLLQDGPAPASPEAGNTLRRWRCHVQRFFYRIYASLRIEELFSIVRD  | 350 |
| FPDSRPAIEDLKYCLERTDQRQQLLVSLKAALETLLHPGVNTCDIITLY   | 400 |
| ISAIKALRVLDPSMVILEVACEPIRRYLRTREDTVRQIVAGLTGDSGTG   | 450 |
| DLAVELSKTDPASLETGQDSEDDSGEPEDWVPDPVDADPGKSSSKRRSSD  | 500 |
| IISLLVSIYGSKDLFINEYRSLADRLHQFSFPEREIRNVELLKLRFG     | 550 |
| EAPMHFCEVMLKDMADSRINANIREEDEKRPAAEQPPFGVYAVILSSEF   | 600 |
| WPPFKDEKLEVPEDIRAALAYCKKYEQLKAMRTLQWHTLGLVTMDVEL    | 650 |
| ADRTLSVAVTPVQAVILLYFQDQASWTLLELSKAVKMPVALLRRRMSVWL  | 700 |
| QQGVLREPPPGTFVIEEERPQDRDNMVLIDSDESDSGMASQADQKEEE    | 750 |
| LLLFWTYIQAMLTNLESLSLDRIYNMLRMFVVTGPALAEIDLQELQGYLQ  | 800 |
| KKVRDQQLVYSAGVYRLPKNCS                              | 822 |

| Predicted monopartite NLS |          |       |
|---------------------------|----------|-------|
| Pos.                      | Sequence | Score |
|                           |          |       |

| Predicted bipartite NLS |                                     |       |
|-------------------------|-------------------------------------|-------|
| Pos.                    | Sequence                            | Score |
| 182                     | RVYMQSKRKGEAGTDPELEGEELDSRYARR      | 5.1   |
| 182                     | RVYMQSKRKGEAGTDPELEGEELDSRYARRRY    | 5.6   |
| 182                     | RVYMQSKRKGEAGTDPELEGEELDSRYARRRYR   | 6.7   |
| 182                     | RVYMQSKRKGEAGTDPELEGEELDSRYARRRYR   | 7.8   |
| 182                     | RVYMQSKRKGEAGTDPELEGEELDSRYARRRYR   | 6.7   |
| 182                     | RVYMQSKRKGEAGTDPELEGEELDSRYARRRYR   | 3     |
| 182                     | RVYMQSKRKGEAGTDPELEGEELDSRYARRRYRLL | 3.2   |
| 182                     | RVYMQSKRKGEAGTDPELEGEELDSRYARRRYRLL | 3.9   |
| 204                     | DSRYARRRYRLLQSPLCAGCSSDKQQCWCR      | 3.8   |
| 206                     | RYARRRYRLLQSPLCAGCSSDKQQCWCRQALE    | 4     |
| 206                     | RYARRRYRLLQSPLCAGCSSDKQQCWCRQALE    | 3.2   |
| 295                     | RVVGWLGKVFLLQDGPAPASPEAGNTLRRWRCHV  | 3.7   |
| 401                     | ISAIKALRVLDPSMVILEVACEPIRRYLRT      | 3.5   |
| 401                     | ISAIKALRVLDPSMVILEVACEPIRRYLRTRE    | 3.4   |
| 491                     | KSSSKRRSSDIISLLVSIYGSKDLFINEYR      | 3.4   |
| 540                     | RNVELLKLRFGEAPMHFCEVMLKDMADSRINA    | 4.2   |
| 604                     | FKDEKLEVPEDIRAALAYCKKYEQLKAMRT      | 3.2   |

>sp|Q12158|SCC1\_YEAST Sister chromatid cohesion protein 1 OS=Saccharomyces cerevisiae (strain ATCC 204508 / S288c) OX=559292 GN=MCD1 PE=1 SV=1

| Predicted NLSs in query sequence                            |     |
|-------------------------------------------------------------|-----|
| MVTENPQRLTVLRLATNKGPLAQIWLASNMSNIPRGSVIQTHIAESAKEI          | 50  |
| AKASGCDDDESGDNEYITLRTSGELLQGIVRVYSKQATFLLTDIKDTLTKI         | 100 |
| SMLFKTSQKMTSTVNRLNTVTRVHQLMLEDAVTEREVLVTPGLEFLDDTT          | 150 |
| IPVGLMAQENSMEKVKQGAAPWDTSLVGRRFSPDEDFEHNLSMNLDF             | 200 |
| DIEEGPITSKSWEEGTRQSSRNFDTHENYIQDDDFPLDDAGTIGWDLGIT          | 250 |
| EKNDQNDDDDNSVEQGRRLGESIMSEPTDFGFDLDIEKEAPAGNIDI             | 300 |
| TDAMTESQPKQTGTRRNSKLLNTKSIQIDEETENSESIASNTYKEERSN           | 350 |
| NLLTPQPTN <b>FTTKRLWSEITESMSYLPDPILKNFLSYESLKKRKIH</b> NGRE | 400 |
| GSIEEPELNVSLNLTDDVISNAGTNDNSFNELTDNMSDFVPIDAGLNEAP          | 450 |
| FPEENIIDAKTRNEQTTIQTEKVRPTPGEVASKAIVQMAKILRKELSEEK          | 500 |
| EVIFTDVLKSQANTEPENITKREASRGFFDILSLATEGCIGLSQTEAFGN          | 550 |
| IKIDAKPALFERFINA                                            | 566 |

| Predicted monopartite NLS |            |       |
|---------------------------|------------|-------|
| Pos.                      | Sequence   | Score |
| 387                       | YESLKKRKIH | 6.5   |

| Predicted bipartite NLS |                               |       |
|-------------------------|-------------------------------|-------|
| Pos.                    | Sequence                      | Score |
| 360                     | FTTKRLWSEITESMSYLPDPILKNFLSY  | 5.5   |
| 360                     | FTTKRLWSEITESMSYLPDPILKNFLSYE | 3.8   |

>sp|Q12440|APC2\_YEAST Anaphase-promoting complex subunit 2 OS=Saccharomyces cerevisiae  
(strain ATCC 204508 / S288c) OX=559292 GN=APC2 PE=1 SV=1

| Predicted NLSs in query sequence                   |     |
|----------------------------------------------------|-----|
| MSFQITPTRDLKQITDELQTLSSYIFHTNIVDDLNSLLTWMSPNDAKSNH | 50  |
| QLRPPSLRIKNIKVLFPNNATTSPYSMINTSQANNSIVNEGNTNKLQL   | 100 |
| QLFSTLKEFYIFQVRYHFFLHFNNINYLKDIQRWENYYEPLRYVPIFDV  | 150 |
| NVNDWALELNSLRHYLLNRNIKFKNNLRTRLDKLIMDDDFDLADNLIQWL | 200 |
| KSANGSLSSTELIVNALYSKINKFCEDNMSRVWNKRFMIMETFNKFQY   | 250 |
| WSQFSKLVGCPEDDHELTTTFVNCFSNFLRIRTNEIFDICVLAYPDSKV  | 300 |
| TLLELRKIMKDFKDYTNIVTTFLSDFKKYILNPSVTTVDALLRYVVTIKA | 350 |
| FLVLDPTGRCLHSITTFVKPYFQERKHLNVNLLYAMLDLPEEELKEKINF | 400 |
| NVDMKALLSLVDTLHDSINQDTNITKRDKNKSPFLWNLVKVGKRELNK   | 450 |
| DLPIRHAMLYEHILNYYIAWVPEPNDMIPGNIKSSYIKTNLFEVLLDLFE | 500 |
| SREFFISEFRNLLTDRLFTLKFYTLDEKWTRCLKLIREKIVKFTETS    | 550 |
| YITNGILGLLETTAPAADADQSNLNSIDVMLWDIKCSEELCRKMHEVAGL | 600 |
| DPIIFPKFISLLWKYNCDTQGSNDLAFHLPIDLERELQKYSDIYSQLKP  | 650 |
| GRKLQLCKDKGKVEIQAFKDGRLVLDVLEQCSVINQFDSNPDEPICL    | 700 |
| SLEQLSESLNIAPPRLTHLLDFWIQGVLLKENGTVSVIEHSEMDFDQAQ  | 750 |
| KTAPMEIENSNYELHNDSEIERKYELTLQRSLPFIEGMLTNLGAMKLHKI | 800 |
| HSFLKITVPKDWGNRITLQQLLEGYLNTLADEGRKYIANGSYEIVKNGH  | 850 |
| KNS                                                | 853 |

#### Predicted monopartite NLS

| Pos. | Sequence | Score |
|------|----------|-------|
|      |          |       |

#### Predicted bipartite NLS

| Pos. | Sequence                          | Score |
|------|-----------------------------------|-------|
| 103  | FSTLKEFYIFQVRYHFFLHFNNINYLKDIQRW  | 3.3   |
| 169  | RNIKFKNNLRTRLDKLIMDDDFDLADNLIQWLK | 3.7   |
| 174  | KNNLRTRLDKLIMDDDFDLADNLIQWLKSAN   | 3.6   |
| 197  | IQWLKSANGSLSSTELIVNALYSKINKFCED   | 3.2   |
| 220  | KINKFCEDNMSRVWNKRFMIMETFNKFQY     | 3     |
| 231  | RVWNKRFMIMETFNKFQYWSQFSKLVGCP     | 4.9   |
| 231  | RVWNKRFMIMETFNKFQYWSQFSKLVGCP     | 3.4   |
| 304  | ELRKIMKDFKDYTNIVTTFLSDFKKYILNP    | 3     |
| 325  | DFKKYILNPSVTTVDALLRYVVTIKAFV      | 3.7   |
| 372  | FQERKHLNVNLLYAMLDLPEEELKEKINFN    | 3     |
| 372  | FQERKHLNVNLLYAMLDLPEEELKEKINFNV   | 4.1   |
| 428  | RDKNKSPFLWNLVKVGKRELNKDLPIRHAMLY  | 3     |
| 441  | KVGKRELNKDLPIRHAMLYEHILNYYIAWV    | 4     |
| 486  | YIKTNLFEVLLDLFESREFFISEFRNLLTD    | 3.4   |
| 516  | RLFTLKFYTLDEKWTRCLKLIREKIVKFTETS  | 3.1   |
| 582  | WDIKCSEELCRKMHEVAGLDPIIFPKFISL    | 3.3   |
| 588  | EELCRKMHEVAGLDPIIFPKFISLLWKYNCDT  | 3.2   |
| 649  | KPGRKLQLCKDKGKVEIQAFKDGRLVLD      | 3.7   |
| 649  | KPGRKLQLCKDKGKVEIQAFKDGRLVLDVS    | 3.1   |
| 747  | DQAQKTAPMEIENSNYELHNDSEIERKYELT   | 3.8   |



>sp|Q921X6|RPC6\_MOUSE DNA-directed RNA polymerase III subunit RPC6 OS=Mus musculus  
OX=10090 GN=Polr3f PE=1 SV=1

| Predicted NLSs in query sequence                    |     |
|-----------------------------------------------------|-----|
| MAEVKVKVQPPDADPVEIENRIELCHQFPHGITDQVIQNEMPHIEAQQR   | 50  |
| AVAINRLLSMGQLDLLRSNTGLLYRIKDSQAGKMKGSDNQEKL VYQIIE  | 100 |
| DAGNKGIWSRDIRYKSNLPLTEINKILKNLESKKLIKAVKSVAAASKKKVY | 150 |
| MLYNLQPDRSVTGGAWYSDQDFESEFVEVLNQQCFKFLQSKAETARESKQ  | 200 |
| NPVIQRNSSFASSHEVWKYICELGISKVELSMEDIETILNTLIYDGK VEM | 250 |
| TIIAAKEGTVGSVDGHMKLYRAVNPILPPTGVVRAPCGLCPVFEDCHEGG  | 300 |
| EISPSNCIYMTWLEF                                     | 316 |

| Predicted monopartite NLS |          |       |
|---------------------------|----------|-------|
| Pos.                      | Sequence | Score |
|                           |          |       |

| Predicted bipartite NLS |                                 |       |
|-------------------------|---------------------------------|-------|
| Pos.                    | Sequence                        | Score |
| 110                     | RDIRYKSNLPLTEINKILKNLESKKLIKA   | 4.1   |
| 110                     | RDIRYKSNLPLTEINKILKNLESKKLIKA   | 5.3   |
| 110                     | RDIRYKSNLPLTEINKILKNLESKKLIKAVK | 6.9   |
| 122                     | EINKILKNLESKKLIKAVKSVAAASKKKVYM | 3.2   |
