# Supplementary material for: Searching for New Z-DNA/Z-RNA Binding Proteins Based on Structural Similarity to Experimentally Validated Zα Domain
Source: Int J Mol Sci. 2022 Jan 11;23(2):768. doi: 10.3390/ijms23020768 (PMC8775963; doi:10.3390/ijms23020768)
Supplement: Supplementary file 1 [file ijms-23-00768-s001.zip]

Archive with 4 entries (4 files):
- Supplementary material 1.xlsx
- Supplementary material 2.pdf
- Supplementary material 3.pdf
- Supplementary material 4.zip
