# Supplementary material for: Searching for New Z-DNA/Z-RNA Binding Proteins Based on Structural Similarity to Experimentally Validated Zα Domain
Source: Int J Mol Sci. 2022 Jan 11;23(2):768. doi: 10.3390/ijms23020768 (PMC8775963; doi:10.3390/ijms23020768)
Supplement: Supplementary file 1 [file ijms-23-00768-s001.zip › Supplementary material 1.xlsx]

## Sheet: rupee_alphafold_results_r_sorte
Supplementary material 1: RUPEE search. RUPEE (https://ayoubresearch.com/) was used to query PDB:3f21 against all AlphaFold2 models. The hits resulting from the “Contained-In”, “Contains”, and “Full-Length” modes using RUPEE were combined to identify the total list of putative unique proteins containing structural similarity to Zα domain Transcriptional factors are highlighted in yellow, proteins…
Species	Protein name	UniProt	RMSD	TM-score	Search type	Status
Escherichia coli	HTH-type transcriptional repressor NsrR	P0AF63	1.65	0.86	Contained-in	Included
Mycobacterium tuberculosis	Putative HTH-type transcriptional regulator Rv1287	P9WME3	1.58	0.85	Contained-in	Included
Mycobacterium tuberculosis	Possible transcriptional regulatory protein	I6Y187	1.63	0.84	Contained-in	Included
Mycobacterium tuberculosis	Possible transcriptional regulatory protein (Probably ArsR-family)	I6Y1A7	1.63	0.83	Contained-in	Included
Mycobacterium tuberculosis	Transcriptional regulator BlaI	P9WMJ5	1.54	0.83	Contained-in	Included
Oryza sativa	Os11g0137500 protein (Transcription initiation factor IIE, alpha subunit, putative, expressed)	Q2RAU2	1.59	0.83	Contained-in	Included
Methanocaldococcus jannaschii	Uncharacterized protein MJ0905	Q58315	1.37	0.83	Contained-in	Included
Escherichia coli	HTH-type transcriptional regulator IscR	P0AGK8	1.99	0.82	Contained-in	Included
Staphylococcus aureus	Peroxide-responsive repressor PerR	Q2G282	1.57	0.82	Contained-in	Included
Mycobacterium tuberculosis	Uncharacterized protein	O06195	1.32	0.82	Contained-in	Included
Staphylococcus aureus	Uncharacterized protein	Q2FXV0	1.78	0.82	Contained-in	Included
Staphylococcus aureus	HTH marR-type domain-containing protein	Q2G141	1.93	0.81	Contained-in	Included
Escherichia coli	Transcriptional regulatory protein DcuR	P0AD01	1.58	0.81	Contained-in	Included
Escherichia coli	Arsenical resistance operon repressor	P37309	1.92	0.81	Contained-in	Included
Staphylococcus aureus	HTH arsR-type domain-containing protein	Q2FWB0	1.37	0.81	Contained-in	Included
Mycobacterium tuberculosis	HTH-type transcriptional regulator NmtR	O69711	1.76	0.81	Contained-in	Included
Methanocaldococcus jannaschii	CRISPR locus-related putative DNA-binding protein Csa3	Q57824	1.59	0.81	Contained-in	Included
Escherichia coli	HTH-type transcriptional regulator XynR (Regulator of xylonate catabolism)	P77300	1.88	0.8	Contained-in	Included
Escherichia coli	Transcriptional regulatory protein DpiA (Destabilizer of plasmid inheritance)	P0AEF4	2.03	0.8	Contained-in	Included
Mycobacterium tuberculosis	HTH-type transcriptional repressor Rv2887	P9WME9	1.89	0.8	Contained-in	Included
Mycobacterium tuberculosis	HTH-type transcriptional regulator MmpR5	I6Y8F7	1.81	0.8	Contained-in	Included
Mycobacterium tuberculosis	Uncharacterized HTH-type transcriptional regulator Rv0880	P9WMF1	1.98	0.8	Contained-in	Included
Staphylococcus aureus	HTH-type transcriptional regulator SarZ (Staphylococcal accessory regulator Z)	Q2FVN3	1.74	0.8	Contained-in	Included
Escherichia coli	Probable [Fe-S]-dependent transcriptional repressor FeoC (Fe(2+) iron transport protein C)	P64638	1.44	0.8	Contained-in	Included
Mycobacterium tuberculosis	Probable transcriptional regulatory protein	P71672	1.66	0.8	Contained-in	Included
Escherichia coli	Transcriptional regulator SlyA	P0A8W2	1.93	0.79	Contained-in	Included
Escherichia coli	Multiple antibiotic resistance protein MarR	P27245	1.91	0.79	Contained-in	Included
Mycobacterium tuberculosis	Uncharacterized protein Rv2011c	P9WLM5	1.76	0.79	Contained-in	Included
Mycobacterium tuberculosis	HTH-type transcriptional repressor SmtB	P9WMI5	1.46	0.79	Contained-in	Included
Mycobacterium tuberculosis	HTH-type transcriptional regulator CmtR	P9WMI9	1.58	0.79	Contained-in	Included
Mycobacterium tuberculosis	Conserved protein	P71885	2.02	0.79	Contained-in	Included
Methanocaldococcus jannaschii	Uncharacterized HTH-type transcriptional regulator MJ1325	Q58721	1.57	0.79	Contained-in	Included
Methanocaldococcus jannaschii	Putative HTH-type transcriptional regulator MJ1563 (DNA-binding protein MJ1563)	Q58958	1.87	0.79	Contained-in	Included
Escherichia coli	Ferric uptake regulation protein (Ferric uptake regulator)	P0A9A9	2.12	0.79	Contained-in	Included
Staphylococcus aureus	HTH marR-type domain-containing protein	Q2FVB5	1.69	0.79	Contained-in	Included
Staphylococcus aureus	HTH marR-type domain-containing protein	Q2FVZ1	1.94	0.79	Contained-in	Included
Methanocaldococcus jannaschii	Uncharacterized HTH-type transcriptional regulator MJ1553	Q58948	1.73	0.78	Contained-in	Included
Glycine max	Uncharacterized protein	I1M6A7	1.82	0.78	Contained-in	Included
Mycobacterium tuberculosis	HTH-type transcriptional regulator KmtR	O53838	1.5	0.78	Contained-in	Included
Leishmania infantum	DNA-directed RNA polymerase III subunit RPC3 (RNA polymerase III subunit C3)	A4HRR3	1.81	0.78	Contained-in	Included
Mycobacterium tuberculosis	HTH-type transcriptional regulator Rv2034	O53478	1.51	0.78	Contained-in	Included
Methanocaldococcus jannaschii	Uncharacterized HTH-type transcriptional regulator MJ0229	Q57682	1.56	0.78	Contained-in	Included
Methanocaldococcus jannaschii	30S ribosomal protein S19e	P54057	1.55	0.77	Contained-in	Included
Mycobacterium tuberculosis	Probable transcriptional regulatory protein	O53238	1.51	0.77	Contained-in	Included
Methanocaldococcus jannaschii	Uncharacterized protein MJ1082	Q58482	2.03	0.77	Contained-in	Included
Methanocaldococcus jannaschii	Uncharacterized protein MJ0432	Q57874	1.85	0.77	Contained-in	Included
Staphylococcus aureus	HTH-type transcriptional regulator MgrA (Regulator of autolytic activity)	Q2G0B1	1.97	0.77	Contained-in	Included
Staphylococcus aureus	Transcriptional regulator, MarR family, putative	Q2FZK9	1.96	0.77	Contained-in	Included
Methanocaldococcus jannaschii	Uncharacterized protein MJ0944	Q58354	2.1	0.77	Contained-in	Included
Methanocaldococcus jannaschii	Uncharacterized HTH-type transcriptional regulator MJ0568	Q57988	2.02	0.76	Contained-in	Included
Escherichia coli	Protein YdaW	P76066	2	0.76	Contained-in	Included
Oryza sativa	Os08g0360000 protein (cDNA clone:002-180-C11, full insert sequence)	Q6YYA4	1.96	0.76	Contained-in	Included
Staphylococcus aureus	HTH-type transcriptional regulator SarR (Staphylococcal accessory regulator R)	Q9F0R1	1.98	0.76	Contained-in	Included
Staphylococcus aureus	PadR domain-containing protein	Q2FUS4	1.74	0.76	Contained-in	Included
Escherichia coli	Probable HTH-type transcriptional regulator YgaV	P77295	1.71	0.76	Contained-in	Included
Staphylococcus aureus	HTH hxlR-type domain-containing protein	Q2FWD5	2.3	0.76	Contained-in	Included
Staphylococcus aureus	HTH-type transcriptional regulator SarT (Staphylococcal accessory regulator T)	Q2G2B1	2.09	0.76	Contained-in	Included
Drosophila melanogaster	Uncharacterized protein	Q9W4L7	1.54	0.76	Contained-in	Included
Mycobacterium tuberculosis	Transcriptional regulator Rv3488	I6X7F9	1.9	0.76	Contained-in	Included
Escherichia coli	Uncharacterized HTH-type transcriptional regulator YtfH	P0ACN2	2.01	0.76	Contained-in	Included
Methanocaldococcus jannaschii	Uncharacterized protein MJ1503	Q58898	2.03	0.76	Contained-in	Included
Escherichia coli	Transcriptional activatory protein CaiF	P0AE58	1.93	0.75	Contained-in	Included
Zea mays	Uncharacterized protein	B4FV69	1.96	0.75	Contained-in	Included
Methanocaldococcus jannaschii	Uncharacterized protein MJECL06	Q60261	2.32	0.75	Contained-in	Included
Mycobacterium tuberculosis	Uncharacterized HTH-type transcriptional regulator Rv0081	P9WMI7	1.92	0.75	Contained-in	Included
Mycobacterium tuberculosis	Uncharacterized HTH-type transcriptional regulator Rv3095	P9WMG3	2.07	0.75	Contained-in	Included
Staphylococcus aureus	HTH marR-type domain-containing protein	Q2FUY4	1.85	0.75	Contained-in	Included
Methanocaldococcus jannaschii	Uncharacterized HTH-type transcriptional regulator MJ0361	Q57807	1.95	0.75	Contained-in	Included
Staphylococcus aureus	Transcriptional regulator SarA (Staphylococcal accessory regulator A)	Q2G2U9	1.89	0.75	Contained-in	Included
Dictyostelium discoideum	Uncharacterized protein	Q54U34	2.12	0.75	Contained-in	Included
Leishmania infantum	Hypothetical_protein_-_conserved	E9AHZ5	2	0.75	Contained-in	Included
Drosophila melanogaster	AT02670p (GEO08884p1) (Uncharacterized protein, isoform A) (Uncharacterized protein, isoform B)	Q8INM8	1.9	0.74	Contained-in	Included
Staphylococcus aureus	Arsenate operon regulator	Q2FXF7	1.68	0.74	Contained-in	Included
Staphylococcus aureus	Uncharacterized protein	Q2G0I3	1.52	0.74	Contained-in	Included
Drosophila melanogaster	GEO10192p1 (IP03615p)	Q9W4L6	1.58	0.74	Contained-in	Included
Staphylococcus aureus	Conserved hypothetical phage protein	Q2FY97	1.67	0.74	Contained-in	Included
Staphylococcus aureus	HTH marR-type domain-containing protein	Q2FVA7	2.1	0.74	Contained-in	Included
Mycobacterium tuberculosis	Transcriptional regulator FurA	P9WN87	1.95	0.74	Contained-in	Included
Arabidopsis thaliana	At1g73940/F2P9_19 (Tumor necrosis factor receptor family protein) (Uncharacterized protein F2P9.19)	Q9C9B5	1.82	0.73	Contained-in	Included
Oryza sativa	Expressed protein (Os03g0852500 protein) (cDNA clone:J023001G15, full insert sequence)	Q851X4	2.1	0.73	Contained-in	Included
Mycobacterium tuberculosis	Possible transcriptional regulatory protein (Probably ArsR-family)	P71941	1.92	0.73	Contained-in	Included
Drosophila melanogaster	DUF4777 domain-containing protein	M9PD66	1.93	0.73	Contained-in	Included
Methanocaldococcus jannaschii	Uncharacterized protein MJ0241	Q57693	1.97	0.73	Contained-in	Included
Mycobacterium tuberculosis	Conserved protein	P71704	1.55	0.73	Contained-in	Included
Drosophila melanogaster	AT27976p (GEO08792p1) (Uncharacterized protein, isoform A) (Uncharacterized protein, isoform B)	Q9VJK3	1.72	0.73	Contained-in	Included
Escherichia coli	LexA repressor (EC 3.4.21.88)	P0A7C2	2.26	0.72	Contained-in	Included
Oryza sativa	Os03g0786800 protein (Fragment)	Q0DMY2	2	0.72	Contained-in	Included
Staphylococcus aureus	LexA repressor (EC 3.4.21.88)	Q2FYU1	2.38	0.72	Contained-in	Included
Glycine max	Uncharacterized protein	K7K161	2.02	0.72	Contained-in	Included
Escherichia coli	cAMP-activated global transcriptional regulator CRP (Catabolite activator protein) (CAP) (Catabolite gene activator) (cAMP receptor protein) (CRP) (cAMP regulatory protein)	P0ACJ8	1.9	0.72	Contained-in	Included
Danio rerio	Zgc:163061 (Zgc:163061 protein)	A4QN90	2.36	0.72	Contained-in	Included
Methanocaldococcus jannaschii	Uncharacterized protein MJ1608	Q59003	1.72	0.71	Contained-in	Included
Drosophila melanogaster	AT22273p (GEO08745p1)	Q7JYP8	2.6	0.71	Contained-in	Included
Glycine max	Uncharacterized protein	I1L524	2.05	0.71	Contained-in	Included
Methanocaldococcus jannaschii	Uncharacterized protein MJ0287	Q57735	2.06	0.71	Contained-in	Included
Drosophila melanogaster	FI15920p1	H9ZYP9	1.81	0.71	Contained-in	Included
Staphylococcus aureus	HTH-type transcriptional regulator SarV (Staphylococcal accessory regulator V)	Q2FVY9	2.08	0.71	Contained-in	Included
Drosophila melanogaster	Uncharacterized protein	X2JFV5	1.81	0.71	Contained-in	Included
Glycine max	H15 domain-containing protein	K7LD40	2.66	0.71	Contained-in	Included
Escherichia coli	Putative galactitol utilization operon repressor	P36930	1.6	0.71	Contained-in	Included
Escherichia coli	Uncharacterized protein YfdN	P76510	2.04	0.71	Contained-in	Included
Drosophila melanogaster	Uncharacterized protein	X2JLC4	1.81	0.71	Contained-in	Included
Oryza sativa	Os11g0137400 protein	A0A0P0XZ21	2.03	0.7	Contained-in	Included
Drosophila melanogaster	Uncharacterized protein	X2JGC6	1.86	0.7	Contained-in	Included
Drosophila melanogaster	Uncharacterized protein	X2JEG9	1.81	0.7	Contained-in	Included
Plasmodium falciparum	Uncharacterized protein	Q9NFA1	2.23	0.7	Contained-in	Included
Glycine max	H15 domain-containing protein	A0A0R0HMY4	2.27	0.7	Contained-in	Included
Drosophila melanogaster	Uncharacterized protein	Q9VEJ7	2.11	0.7	Contained-in	Included
Drosophila melanogaster	IP03616p (Uncharacterized protein, isoform A) (Uncharacterized protein, isoform B)	Q9W4L4	2.09	0.7	Contained-in	Included
Drosophila melanogaster	Uncharacterized protein	X2JFW2	1.86	0.7	Contained-in	Included
Drosophila melanogaster	Uncharacterized protein	X2JEG4	2.07	0.7	Contained-in	Included
Staphylococcus aureus	HTH-type transcriptional regulator rot (Repressor of toxins)	Q9RFJ6	2.15	0.7	Contained-in	Included
Methanocaldococcus jannaschii	Uncharacterized HTH-type transcriptional regulator MJ0925	Q58335	2.31	0.69	Contained-in	Included
Oryza sativa	Os01g0658500 protein	A0A0P0V6A0	2.17	0.69	Contained-in	Included
Staphylococcus aureus	Uncharacterized protein	Q2G007	2.55	0.69	Contained-in	Included
Escherichia coli	Regulatory protein YeiL	P0A9E9	2.15	0.69	Contained-in	Included
Staphylococcus aureus	Conserved hypothetical phage protein	Q2FY93	2.46	0.68	Contained-in	Included
Caenorhabditis elegans	ETS domain-containing protein	O44138	2.44	0.68	Contained-in	Included
Staphylococcus aureus	Redox-sensing transcriptional repressor Rex	Q2FWL6	2.32	0.67	Contained-in	Included
Staphylococcus aureus	Heme response regulator HssR	Q2FVQ9	2.46	0.67	Contained-in	Included
Rattus norvegicus	40S ribosomal protein S25	D4AE10	2.11	0.67	Contained-in	Included
Staphylococcus aureus	HTH gntR-type domain-containing protein	Q2FWW6	2.67	0.67	Contained-in	Included
Escherichia coli	Inhibitor of hydrogen peroxide resistance	P0AAP5	2.32	0.67	Contained-in	Included
Leishmania infantum	40S ribosomal protein S25	Q9N9V4	2.27	0.66	Contained-in	Included
Caenorhabditis elegans	40S ribosomal protein S25	P52821	2.21	0.66	Contained-in	Included
Rattus norvegicus	40S ribosomal protein S25	F1M6F4	2.08	0.66	Contained-in	Included
Methanocaldococcus jannaschii	Uncharacterized protein MJ1005	Q58411	2.69	0.66	Contained-in	Included
Rattus norvegicus	40S ribosomal protein S25	M0R763	2.11	0.66	Contained-in	Included
Homo sapiens	40S ribosomal protein S25 (Small ribosomal subunit protein eS25)	P62851	2.13	0.66	Contained-in	Included
Rattus norvegicus	40S ribosomal protein S25	P62853	2.13	0.66	Contained-in	Included
Danio rerio	40S ribosomal protein S25	Q6PBI5	2.15	0.66	Contained-in	Included
Glycine max	40S ribosomal protein S25	I1LJB4	2.15	0.65	Contained-in	Included
Drosophila melanogaster	40S ribosomal protein S25	P48588	2.23	0.65	Contained-in	Included
Danio rerio	Si:dkey-29b11.3	F6NWN8	2.65	0.65	Contained-in	Included
Danio rerio	TFIIF_beta domain-containing protein	A0A2R8PVE4	1.99	0.65	Contained-in	Included
Mus musculus	40S ribosomal protein S25	P62852	2.14	0.65	Contained-in	Included
Zea mays	40S ribosomal protein S25	B4FSL2	2.14	0.65	Contained-in	Included
Arabidopsis thaliana	40S ribosomal protein S25-3	Q8GYL5	2.19	0.65	Contained-in	Included
Mycobacterium tuberculosis	Probable transcriptional regulatory protein	O06550	2.77	0.65	Contained-in	Included
Methanocaldococcus jannaschii	Putative uncharacterized protein MJ0819	Q58229	1.7	0.65	Contained-in	Included
Arabidopsis thaliana	40S ribosomal protein S25-1	Q9SIW5	2.2	0.65	Contained-in	Included
Arabidopsis thaliana	40S ribosomal protein S25-2	Q9SIK2	1.95	0.65	Contained-in	Included
Arabidopsis thaliana	40S ribosomal protein S25-4	Q9T029	1.96	0.65	Contained-in	Included
Oryza sativa	40S ribosomal protein S25	Q652P8	2.25	0.64	Contained-in	Included
Oryza sativa	40S ribosomal protein S25	Q6YZI2	2.24	0.64	Contained-in	Included
Trypanosoma cruzi	40S ribosomal protein S25	Q4DTX6	2.12	0.64	Contained-in	Included
Schizosaccharomyces pombe	40S ribosomal protein S25-B (S31-B)	O74172	2.24	0.64	Contained-in	Included
Zea mays	40S ribosomal protein S25	B4FG22	2.3	0.64	Contained-in	Included
Glycine max	40S ribosomal protein S25	C6SWX1	2.24	0.64	Contained-in	Included
Schizosaccharomyces pombe	40S ribosomal protein S25-A (S31-A)	P79009	2.26	0.64	Contained-in	Included
Saccharomyces cerevisiae	40S ribosomal protein S25-A (RP45) (S31) (Small ribosomal subunit protein eS25-A) (YS23)	Q3E792	2.28	0.64	Contained-in	Included
Rattus norvegicus	40S ribosomal protein S25	D3ZCH5	2.24	0.64	Contained-in	Included
Glycine max	40S ribosomal protein S25	I1K759	2.25	0.64	Contained-in	Included
Candida albicans	40S ribosomal protein S25	A0A1D8PNQ6	2.24	0.64	Contained-in	Included
Glycine max	Rad21_Rec8 domain-containing protein	A0A0R0FW54	2.56	0.64	Contained-in	Included
Danio rerio	Ribosomal protein S10	Q7T1J9	2.3	0.64	Contained-in	Included
Oryza sativa	40S ribosomal protein S25	Q53QG2	2.35	0.64	Contained-in	Included
Homo sapiens	40S ribosomal protein S10 (Small ribosomal subunit protein eS10)	P46783	2.28	0.64	Contained-in	Included
Rattus norvegicus	S10_plectin domain-containing protein	D3ZCN9	2.31	0.64	Contained-in	Included
Zea mays	NB-ARC domain containing protein expressed	A0A1D6LKS4	2.23	0.63	Contained-in	Included
Caenorhabditis elegans	S10_plectin domain-containing protein	O01869	2.42	0.63	Contained-in	Included
Mus musculus	40S ribosomal protein S10	P63325	2.29	0.63	Contained-in	Included
Rattus norvegicus	S10_plectin domain-containing protein	D3ZJY5	2.3	0.63	Contained-in	Included
Dictyostelium discoideum	40S ribosomal protein S25 (S31)	Q03409	2.28	0.63	Contained-in	Included
Rattus norvegicus	40S ribosomal protein S10	P63326	2.3	0.63	Contained-in	Included
Rattus norvegicus	Ribosomal protein S10-like 1	F1LT36	2.29	0.63	Contained-in	Included
Plasmodium falciparum	40S ribosomal protein S10, putative	Q8IBQ5	2.44	0.63	Contained-in	Included
Glycine max	S10_plectin domain-containing protein	I1LGD6	2.43	0.63	Contained-in	Included
Schizosaccharomyces pombe	40S ribosomal protein S10-A	O14112	2.44	0.63	Contained-in	Included
Arabidopsis thaliana	40S ribosomal protein S10-3	Q9LTF2	2.43	0.63	Contained-in	Included
Zea mays	Ribosomal protein S10	J7LC26	2.44	0.63	Contained-in	Included
Saccharomyces cerevisiae	40S ribosomal protein S25-B (RP45) (S31) (Small ribosomal subunit protein eS25-B) (YS23)	P0C0T4	2.34	0.63	Contained-in	Included
Plasmodium falciparum	40S ribosomal protein S25	Q8ILN8	2.36	0.63	Contained-in	Included
Glycine max	S10_plectin domain-containing protein	I1K6E7	2.44	0.63	Contained-in	Included
Oryza sativa	40S ribosomal protein S10-1	P0DKK8	2.44	0.63	Contained-in	Included
Dictyostelium discoideum	40S ribosomal protein S10	O77082	2.54	0.63	Contained-in	Included
Zea mays	40S ribosomal protein S10-1	B4FSW0	2.44	0.63	Contained-in	Included
Schizosaccharomyces pombe	40S ribosomal protein S10-B	O13614	2.45	0.63	Contained-in	Included
Rattus norvegicus	Forkhead box protein I2 (Hepatocyte nuclear factor 3 forkhead homolog 5) (HFH-5) (Fragment)	Q63248	2.62	0.63	Contained-in	Included
Zea mays	40S ribosomal protein S10-1	A0A1D6PJ49	2.44	0.63	Contained-in	Included
Rattus norvegicus	S10_plectin domain-containing protein	D3ZH53	2.41	0.62	Contained-in	Included
Saccharomyces cerevisiae	40S ribosomal protein S10-A (Small ribosomal subunit protein eS10-A)	Q08745	2.49	0.62	Contained-in	Included
Saccharomyces cerevisiae	40S ribosomal protein S10-B (Small ribosomal subunit protein eS10-B)	P46784	2.48	0.62	Contained-in	Included
Candida albicans	Ribosomal 40S subunit protein S10A	A0A1D8PI15	2.5	0.62	Contained-in	Included
Escherichia coli	Uncharacterized membrane protein YohP	C1P609	1.82	0.6	Contains	Included
Staphylococcus aureus	Ferric uptake regulation protein (Ferric uptake regulator)	Q2FY19	1.67	0.81	Contained-in	Excluded
Escherichia coli	Bacterial microcompartment shell protein EutK (Ethanolamine utilization protein EutK)	P76540	1.33	0.79	Contained-in	Excluded
Glycine max	Glucose-6-phosphate isomerase (EC 5.3.1.9)	A0A0R0GEU1	1.88	0.79	Contained-in	Excluded
Mycobacterium tuberculosis	Zinc uptake regulation protein (Zinc uptake regulator)	P9WN85	1.83	0.79	Contained-in	Excluded
Rattus norvegicus	Uncharacterized protein	D3ZSH6	1.4	0.78	Contained-in	Excluded
Methanocaldococcus jannaschii	Uncharacterized protein MJ0773	Q58183	2.29	0.78	Contained-in	Excluded
Arabidopsis thaliana	At5g49410 (Gb|AAF36742.1) (Thiamine-phosphate synthase)	Q9FGX6	1.9	0.77	Contained-in	Excluded
Saccharomyces cerevisiae	40S ribosomal protein S19-B (RP55B) (S16a) (Small ribosomal subunit protein eS19-B) (YS16B)	P07281	1.7	0.77	Contained-in	Excluded
Escherichia coli	Zinc uptake regulation protein (Zinc uptake regulator)	P0AC51	1.6	0.77	Contained-in	Excluded
Schizosaccharomyces pombe	40S ribosomal protein S19-A (S16-A)	P58234	1.74	0.77	Contained-in	Excluded
Saccharomyces cerevisiae	40S ribosomal protein S19-A (RP55A) (S16a) (Small ribosomal subunit protein eS19-A) (YP45) (YS16A)	P07280	1.78	0.77	Contained-in	Excluded
Schizosaccharomyces pombe	40S ribosomal protein S19-B (S16-B)	P79016	1.76	0.77	Contained-in	Excluded
Drosophila melanogaster	40S ribosomal protein S19a	P39018	1.67	0.77	Contained-in	Excluded
Candida albicans	Ribosomal 40S subunit protein S19A	A0A1D8PK61	1.81	0.77	Contained-in	Excluded
Methanocaldococcus jannaschii	Uncharacterized protein MJ1499	Q58894	1.79	0.77	Contained-in	Excluded
Escherichia coli	Uncharacterized protein YjeN	P39283	2.02	0.77	Contained-in	Excluded
Rattus norvegicus	Uncharacterized protein	D3ZUD7	1.78	0.77	Contained-in	Excluded
Oryza sativa	40S ribosomal protein S19	P40978	1.69	0.76	Contained-in	Excluded
Rattus norvegicus	40S ribosomal protein S19	F1M764	1.81	0.76	Contained-in	Excluded
Zea mays	40S ribosomal protein S19 (40S ribosomal protein S19-3)	B4FD90	1.68	0.76	Contained-in	Excluded
Trypanosoma cruzi	Uncharacterized protein (Fragment)	Q4DCJ7	1.9	0.76	Contained-in	Excluded
Drosophila melanogaster	40S ribosomal protein S19b	Q7KS38	1.78	0.76	Contained-in	Excluded
Trypanosoma cruzi	Ribosomal protein S19, putative	Q4D6N9	1.65	0.76	Contained-in	Excluded
Plasmodium falciparum	40S ribosomal protein S19	Q8IFP2	1.75	0.76	Contained-in	Excluded
Trypanosoma cruzi	Ribosomal protein S19, putative	Q4DJY1	1.71	0.76	Contained-in	Excluded
Zea mays	40S ribosomal protein S19 (40S ribosomal protein S19-3)	B4FP25	1.74	0.76	Contained-in	Excluded
Rattus norvegicus	40S ribosomal protein S19	P17074	1.82	0.76	Contained-in	Excluded
Rattus norvegicus	40S ribosomal protein S19	D4A6G6	1.81	0.76	Contained-in	Excluded
Arabidopsis thaliana	40S ribosomal protein S19-2	Q9LF30	1.8	0.76	Contained-in	Excluded
Homo sapiens	40S ribosomal protein S19 (Small ribosomal subunit protein eS19)	P39019	1.78	0.76	Contained-in	Excluded
Mus musculus	40S ribosomal protein S19	Q9CZX8	1.83	0.76	Contained-in	Excluded
Arabidopsis thaliana	40S ribosomal protein S19-1	Q9SGA6	1.77	0.76	Contained-in	Excluded
Rattus norvegicus	40S ribosomal protein S19	D3ZGN8	1.76	0.76	Contained-in	Excluded
Glycine max	Uncharacterized protein	I1LWR7	1.79	0.76	Contained-in	Excluded
Rattus norvegicus	Ribosomal protein S19-like 1	F1LYF3	1.79	0.76	Contained-in	Excluded
Arabidopsis thaliana	40S ribosomal protein S19-3	Q9FNP8	1.77	0.76	Contained-in	Excluded
Glycine max	Uncharacterized protein	C6T4Z6	1.79	0.76	Contained-in	Excluded
Leishmania infantum	40S ribosomal protein S19-like protein (40S_ribosomal_protein_S19-like_protein)	A4I4Y2	1.72	0.76	Contained-in	Excluded
Rattus norvegicus	40S ribosomal protein S19	F1M8C7	1.85	0.76	Contained-in	Excluded
Glycine max	Uncharacterized protein	C6SVR8	1.8	0.76	Contained-in	Excluded
Glycine max	Uncharacterized protein	I1JW21	1.81	0.76	Contained-in	Excluded
Dictyostelium discoideum	40S ribosomal protein S19	Q54X51	1.96	0.76	Contained-in	Excluded
Glycine max	DNA-directed RNA polymerase III subunit RPC3 (RNA polymerase III subunit C3)	I1NGS5	2.2	0.76	Contained-in	Excluded
Staphylococcus aureus	Transcriptional regulator, Fur, putative	Q2FY73	2	0.75	Contained-in	Excluded
Caenorhabditis elegans	40S ribosomal protein S19	O18650	1.76	0.74	Contained-in	Excluded
Zea mays	Condensin-2 complex subunit H2	A0A1D6LJ87	2.3	0.72	Contained-in	Excluded
Staphylococcus aureus	Segregation and condensation protein B	Q2FY77	1.89	0.7	Contained-in	Excluded
Oryza sativa	Os06g0240800 protein	A0A0P0WUH8	2.2	0.7	Contained-in	Excluded
Arabidopsis thaliana	Vacuolar protein sorting-associated protein 25 (AtVPS25) (ESCRT-II complex subunit VPS25)	Q8VZC9	2.18	0.69	Contained-in	Excluded
Drosophila melanogaster	Vacuolar protein-sorting-associated protein 25 (ESCRT-II complex subunit VPS25) (Vacuolar protein sorting 25)	Q7JXV9	2.28	0.69	Contained-in	Excluded
Escherichia coli	TorCAD operon transcriptional regulatory protein TorR	P38684	2.38	0.68	Contained-in	Excluded
Plasmodium falciparum	Uncharacterized protein	C0H5L3	2.05	0.68	Contained-in	Excluded
Candida albicans	ESCRT-II subunit protein	Q5AK78	2.36	0.68	Contained-in	Excluded
Staphylococcus aureus	Response regulator SaeR (Staphylococcus exoprotein expression protein R)	Q2G2G2	2.56	0.68	Contained-in	Excluded
Staphylococcus aureus	Response regulator protein GraR (Glycopeptide resistance-associated protein R)	Q2G0E0	2.32	0.68	Contained-in	Excluded
Caenorhabditis elegans	Uncharacterized RING finger protein T02C1.1	Q03605	2.24	0.68	Contained-in	Excluded
Danio rerio	Vacuolar protein-sorting-associated protein 25 (ESCRT-II complex subunit VPS25)	Q6NWF4	2.66	0.68	Contained-in	Excluded
Mycobacterium tuberculosis	Transcriptional regulatory protein TcrA	O07776	2.56	0.68	Contained-in	Excluded
Glycine max	Uncharacterized protein	A0A0R0JKH7	2.42	0.68	Contained-in	Excluded
Homo sapiens	Vacuolar protein-sorting-associated protein 25 (hVps25) (Dermal papilla-derived protein 9) (ELL-associated protein of 20 kDa) (ESCRT-II complex subunit VPS25)	Q9BRG1	2.63	0.68	Contained-in	Excluded
Mus musculus	Vacuolar protein-sorting-associated protein 25 (ESCRT-II complex subunit VPS25)	Q9CQ80	2.51	0.68	Contained-in	Excluded
Rattus norvegicus	Vacuolar protein-sorting-associated protein 25 (ELL-associated protein of 20 kDa) (ESCRT-II complex subunit VPS25)	P0C0A1	2.52	0.68	Contained-in	Excluded
Drosophila melanogaster	LP16467p (Uncharacterized protein, isoform A)	Q9VZW6	2.37	0.66	Contained-in	Excluded
Dictyostelium discoideum	Vacuolar protein-sorting-associated protein 25 (ESCRT-II complex subunit VPS25)	Q55GD9	2.32	0.66	Contained-in	Excluded
Caenorhabditis elegans	ESCRT-II complex subunit VPS25 (Vacuolar protein-sorting-associated protein 25)	Q9U354	2.24	0.66	Contained-in	Excluded
Candida albicans	Non-structural maintenance of chromosomes element 1 homolog (EC 2.3.2.27)	A0A1D8PP17	2.55	0.65	Contained-in	Excluded
Schizosaccharomyces pombe	Vacuolar protein-sorting-associated protein 25	O74967	2.5	0.65	Contained-in	Excluded
Mus musculus	Costars family protein ABRACL (ABRA C-terminal-like protein)	Q4KML4	3.12	0.65	Contained-in	Excluded
Danio rerio	Costars family protein ABRACL (ABRA C-terminal-like protein)	Q6TGV7	3.08	0.65	Contained-in	Excluded
Zea mays	Spindle and kinetochore-associated protein 1-like protein	A0A1D6IBP3	2.8	0.65	Contained-in	Excluded
Dictyostelium discoideum	Protein costars	Q558Y7	2.92	0.65	Contained-in	Excluded
Saccharomyces cerevisiae	Vacuolar protein-sorting-associated protein 25 (ESCRT-II complex subunit VPS25)	P47142	2.6	0.65	Contained-in	Excluded
Rattus norvegicus	ABRA C-terminal-like protein (Costars family protein ABRACL)	D3ZSL2	3.11	0.65	Contained-in	Excluded
Caenorhabditis elegans	Costars domain-containing protein	O62234	2.62	0.64	Contained-in	Excluded
Homo sapiens	Costars family protein ABRACL (ABRA C-terminal-like protein)	Q9P1F3	3.14	0.64	Contained-in	Excluded
Mycobacterium tuberculosis	Uncharacterized protein	O50392	2.35	0.64	Contained-in	Excluded
Zea mays	Costars family protein	B6T1Q3	2.51	0.64	Contained-in	Excluded
Arabidopsis thaliana	Costars family protein At4g33640	Q8LBN7	2.5	0.64	Contained-in	Excluded
Mycobacterium tuberculosis	Arginine repressor	P9WPY9	2.6	0.64	Contained-in	Excluded
Oryza sativa	Costars family protein	Q6AVK1	3.09	0.64	Contained-in	Excluded
Staphylococcus aureus	Transcriptional regulator CtsR	Q2G0P8	2.41	0.63	Contained-in	Excluded
Glycine max	Costars domain-containing protein	I1KQX7	2.89	0.63	Contained-in	Excluded
Oryza sativa	Os01g0962600 protein	Q94DM7	2.43	0.63	Contained-in	Excluded
Zea mays	NB-ARC domain containing protein expressed	A0A1D6HBE5	2.22	0.63	Contained-in	Excluded
Glycine max	Costars domain-containing protein	I1KL58	2.67	0.63	Contained-in	Excluded
Staphylococcus aureus	Arginine repressor	Q2FUX5	2.52	0.63	Contained-in	Excluded
Escherichia coli	Arginine repressor	P0A6D0	2.49	0.62	Contained-in	Excluded
Staphylococcus aureus	Uncharacterized protein	Q2FY70	2.7	0.61	Contained-in	Excluded
Methanocaldococcus jannaschii	HTH-type transcriptional regulator Ptr2	Q58133	1.93	0.6	Contained-in	Excluded
Mycobacterium tuberculosis	Possible transcriptional regulatory protein (Probably Lrp/AsnC-family)	O33321	2.51	0.6	Contained-in	Excluded
Escherichia coli	Probable [Fe-S]-dependent transcriptional repressor FeoC (Fe(2+) iron transport protein C)	P64638	1.44	0.69	Contains	Included
Methanocaldococcus jannaschii	Uncharacterized protein MJ1608	Q59003	1.72	0.69	Contains	Included
Methanocaldococcus jannaschii	Uncharacterized HTH-type transcriptional regulator MJ1325	Q58721	1.57	0.61	Contains	Included
Escherichia coli	Probable [Fe-S]-dependent transcriptional repressor FeoC	P64638	1.44	0.74	Full-length	Included
Methanocaldococcus jannaschii	Uncharacterized protein MJ1608	Q59003	1.72	0.7	Full-length	Included
Methanocaldococcus jannaschii	Uncharacterized HTH-type transcriptional regulator MJ1325	Q58721	1.57	0.69	Full-length	Included
Methanocaldococcus jannaschii	Uncharacterized protein MJ0432	Q57874	1.85	0.67	Full-length	Included
Methanocaldococcus jannaschii	Uncharacterized HTH-type transcriptional regulator MJ0229	Q57682	1.56	0.66	Full-length	Included
Drosophila melanogaster	GEO10192p1	Q9W4L6	1.58	0.65	Full-length	Included
Staphylococcus aureus	HTH arsR-type domain-containing protein	Q2FWB0	1.37	0.64	Full-length	Included
Escherichia coli	Probable HTH-type transcriptional regulator YgaV	P77295	1.71	0.63	Full-length	Included
Staphylococcus aureus	Uncharacterized protein	Q2FXV0	1.78	0.63	Full-length	Included
Drosophila melanogaster	Uncharacterized protein	X2JFV5	1.81	0.63	Full-length	Included
Drosophila melanogaster	Uncharacterized protein	X2JGC6	1.86	0.62	Full-length	Included
Drosophila melanogaster	Uncharacterized protein	X2JLC4	1.81	0.62	Full-length	Included
Drosophila melanogaster	Uncharacterized protein	X2JEG9	1.81	0.62	Full-length	Included
Drosophila melanogaster	Uncharacterized protein	Q9VEJ7	2.11	0.62	Full-length	Included
Drosophila melanogaster	FI15920p1	H9ZYP9	1.81	0.62	Full-length	Included
Drosophila melanogaster	Uncharacterized protein	X2JFW2	1.86	0.62	Full-length	Included
Mycobacterium tuberculosis	Transcriptional regulator Rv3488	I6X7F9	1.9	0.61	Full-length	Included
Drosophila melanogaster	Uncharacterized protein	X2JEG4	2.07	0.61	Full-length	Included
Staphylococcus aureus	Arsenate operon regulator	Q2FXF7	1.68	0.61	Full-length	Included
Methanocaldococcus jannaschii	Uncharacterized protein MJ0287	Q57735	2.06	0.6	Full-length	Included
Drosophila melanogaster	IP03616p	Q9W4L4	2.09	0.6	Full-length	Included
Methanocaldococcus jannaschii	Uncharacterized HTH-type transcriptional regulator MJ0361	Q57807	1.95	0.6	Full-length	Included
Staphylococcus aureus	HTH hxlR-type domain-containing protein	Q2FWD5	2.3	0.6	Full-length	Included
Escherichia coli	Uncharacterized protein YjeN	P39283	2.02	0.63	Full-length	Excluded
Mus musculus	Costars family protein ABRACL	Q4KML4	3.12	0.6	Full-length	Excluded
Danio rerio	Costars family protein ABRACL	Q6TGV7	3.08	0.6	Full-length	Excluded
Rattus norvegicus	ABRA C-terminal-like protein	D3ZSL2	3.11	0.6	Full-length	Excluded
Dictyostelium discoideum	Protein costars	Q558Y7	2.92	0.6	Full-length	Excluded
Homo sapiens	Costars family protein ABRACL	Q9P1F3	3.14	0.6	Full-length	Excluded
Staphylococcus aureus	Uncharacterized protein	Q2G007	2.55	0.6	Full-length	Excluded
